# Supplementary material for: Words matter: political and gender analysis of speeches made by heads of government during the COVID-19 pandemic
Source: PubMed Central journal article supplement (PMC7849321; doi:10.1136/bmjgh-2020-003910), 2021-01-29
Supplement: bmjgh-2020-003910supp001.pdf [file bmjgh-2020-003910supp001.pdf]

**Appendix Table 1: Inclusion/Exclusion of countries**

| <b>COUNTRY</b>                          | <b>Leader</b>    | <b>M/W</b> | <b>inclusion Rationale</b> | <b>Region</b> | <b>reason for exclusion</b>                                                       |
|-----------------------------------------|------------------|------------|----------------------------|---------------|-----------------------------------------------------------------------------------|
| <b>Belgium</b>                          | Wilmès           | W          | G10, UNSC, Woman           | Europe        | Included                                                                          |
| <b>France</b>                           | Macron           | M          | G10, UNSC                  | Europe        | Included                                                                          |
| <b>Germany</b>                          | Merkel           | W          | G10, UNSC, Woman           | Europe        | Included                                                                          |
| <b>United Kingdom</b>                   | Johnson          | M          | G10, UNSC                  | Europe        | Included                                                                          |
| <b>United States</b>                    | Trump            | M          | G10, UNSC                  | North America | Included                                                                          |
| <b>Brazil</b>                           | Bolsonaro        | M          | BRICS                      | South America | Included                                                                          |
| <b>Russia</b>                           | Putin            | M          | BRICS, UNSC                | Europe/Asia   | Included                                                                          |
| <b>India</b>                            | Modi             | M          | BRICS                      | Asia          | Included                                                                          |
| <b>South Africa</b>                     | Ramaphosa        | M          | BRICS, UNSC                | Africa        | Included                                                                          |
| <b>Dominican Republic</b>               | Medina           | M          | UNSC                       | Caribbean     | Included                                                                          |
| <b>Indonesia</b>                        | Widodo           | M          | UNSC                       | Asia          | Included                                                                          |
| <b>Niger</b>                            | Issoufou         | M          | UNSC                       | Africa        | Included                                                                          |
| <b>Saint Vincent and the Grenadines</b> | Gonsalves        | M          | UNSC                       | Caribbean     | Excluded – Speeches not available on public domain                                |
| <b>Tunisia</b>                          | Fakhfakh         | M          | UNSC                       | Africa        | Excluded – Speech transcripts not available, no capacity to transcribe Arabic     |
| <b>Vietnam</b>                          | Nguyễn Phú Trọng | M          | UNSC                       | Asia          | Excluded – Speech transcripts not available, no capacity to transcribe Vietnamese |
| <b>Bangladesh</b>                       | Hasina           | W          | Woman                      | Asia          | Included                                                                          |
| <b>Barbados</b>                         | Mottley          | W          | Woman                      | Caribbean     | Excluded – Only 1 speech available, other Caribbean nation chosen                 |
| <b>Bolivia</b>                          | Añez             | W          | Woman                      | South America | Included                                                                          |
| <b>Denmark</b>                          | Frederiksen      | W          | Woman                      | Europe        | Excluded – Only 1 speech available, other European countries already represented  |
| <b>Finland</b>                          | Marin            | W          | Woman                      | Europe        | Included                                                                          |
| <b>Iceland</b>                          | Jakobsdóttir     | W          | Woman                      | Europe        | Excluded – Speeches not available on public domain                                |
| <b>Namibia</b>                          | Kuugongelwa      | W          | Woman                      | Africa        | Excluded – Speeches not available on public domain                                |

|                            |          |   |       |           |                                         |
|----------------------------|----------|---|-------|-----------|-----------------------------------------|
| <b><i>New Zealand</i></b>  | Ardern   | W | Woman | Oceania   | Included                                |
| <b><i>Norway</i></b>       | Solberg  | W | Woman | Europe    | Included                                |
| <b><i>Scotland</i></b>     | Sturgeon | W | Woman | Europe    | Included                                |
| <b><i>Serbia</i></b>       | Brnabic  | W | Woman | Europe    | Speeches not available on public domain |
| <b><i>Sint Maarten</i></b> | Jacobs   | W | Woman | Caribbean | Included                                |
| <b><i>Taiwan</i></b>       | Ing-wen  | W | Woman | Asia      | Included                                |

## Appendix 2: Sources for public statements/speeches

জাতির উদ্দেশ্যে ভাষণ [Bangladesh]: প্রধানমন্ত্রীর কার্যালয়  
গণপ্রজাতন্ত্রী বাংলাদেশ সরকার

প্রধানমন্ত্রীর কার্যালয় সংক্রান্ত; 2020 [Available from: <https://pmo.gov.bd/site/view/pm-speech/%E0%A6%9C%E0%A6%BE%E0%A6%A4%E0%A6%BF%E0%A6%B0-%E0%A6%89%E0%A6%A6%E0%A7%8D%E0%A6%A6%E0%A7%87%E0%A6%B6%E0%A7%8D%E0%A6%AF%E0%A7%87-%E0%A6%AD%E0%A6%BE%E0%A6%B7%E0%A6%A3>].

Sophie Wilmés News [Belgium]: Belgium Premier; 2020 [Available from: <https://www.premier.be/en/timeline>].

Jeanine Añez President of Bolivia [Bolivia] 2020 [Available from: <https://www.youtube.com/channel/UC7QjQXQopwIvJ9KfmYj7EAO>].

Últimos Pronunciamentos [Brazil]: Presidência da República; 2020 [Available from: <https://www.gov.br/planalto/pt-br/acompanhe-o-planalto/pronunciamentos>].

Ante el CoronaVirus Danilo Medina habla al pueblo Dominicano [Dominican Republic]: Gobierno Danilo Medina; 2020 [updated 25 March 2020. Available from: <https://www.youtube.com/watch?v=-h3vYohxADw>].

Discurso presidente Medina por covid-19 [Dominican Republic]: Noticias SIN; 2020 [updated 17 March 2020. Available from: <https://www.youtube.com/watch?v=rk63OZw8VHE>].

Speeches [Finland]: Finnish Government; 2020 [Available from: <https://valtioneuvosto.fi/en/current-issues/speeches>].

Official speeches and statements 2020 [France]: Embassy of France in the United States; 2020 [Available from: <https://franceintheus.org/spip.php?rubrique501>].

Live from the Chancellery [Germany]: Die Bundeskanzlerin; 2020 [Available from: <https://www.bundeskanzlerin.de/bkin-de/mediathek/live-aus-dem-kanzleramt>].

Text Speeches [India]: Narendra Modi; 2020 [Available from: <https://www.narendramodi.in/category/text-speeches>].

Speech Transcripts [Indonesia]: Cabinet Secretariat of the Republic of Indonesia; 2020 [Available from: <https://setkab.go.id/en/category/speech-transcript/page/4/>].

Rt Hon Jacinda Ardern [New Zealand]: The official website of the New Zealand Government; 2020 [Available from: <https://www.beehive.govt.nz/minister/rt-hon-jacinda-ardern>].

Speeches [Niger]: Présidence de la République du Niger; 2020 [Available from: <https://www.presidence.ne/discours-du-prsident>].

Finn aktuelt [Norway]: Regjeringen; 2020 [Available from: [https://www.regjeringen.no/no/aktuelt/aktuelle\\_saker/id2000005/?ownerid=&documenttype=aktuelt/talerogartikler&term=&page=4](https://www.regjeringen.no/no/aktuelt/aktuelle_saker/id2000005/?ownerid=&documenttype=aktuelt/talerogartikler&term=&page=4)].

Transcripts [Russia]: President of Russia; 2020 [Available from: <http://en.kremlin.ru/events/president/transcripts/page/4>].

First Minister's Speeches [Scotland]: Scottish Government; 2020 [Available from: <https://www.gov.scot/collections/first-ministers-speeches/#2020>].

Speeches [South Africa]: South African Government; 2020 [Available from: <https://www.gov.za/speeches>].

Government of Sint Maarten [Sint Maarten] 2020 [Available from: <https://www.youtube.com/channel/UC1bIsTYvgBE1AZ75j9HISBA>].

News & activities [Taiwan]: Office of the President Republic of China (Taiwan); 2020 [Available from: <https://english.president.gov.tw/Page/35>].

News and communications, Prime Minister's Office, 10 Downing Street [United Kingdom]: United Kingdom Government; 2020 [Available from: [https://www.gov.uk/search/all?parent=prime-ministers-office-10-downing-street&content\\_purpose\\_supergroup%5B%5D=news\\_and\\_communications&organisations%5B%5D=prime-ministers-office-10-downing-street&order=updated-newest](https://www.gov.uk/search/all?parent=prime-ministers-office-10-downing-street&content_purpose_supergroup%5B%5D=news_and_communications&organisations%5B%5D=prime-ministers-office-10-downing-street&order=updated-newest)].

Briefings & Statements [United States]: White House; 2020 [Available from: [https://www.whitehouse.gov/briefings-statements/?issue\\_filter=healthcare](https://www.whitehouse.gov/briefings-statements/?issue_filter=healthcare)].
